# Supplementary material
Source: PubMed Central journal article supplement (PMC3487588)
Supplement: supp_2011.060822_2011_060822-Contributions.pdf [file supp_2011.060822_2011_060822-Contributions.pdf]

**Manuscript no. HAEMATOL/2011/060822 entitled “Production of the effector cytokine interleukin-17, rather than interferon- $\gamma$ , is more strongly associated with autoimmune hemolytic anemia”**

**Authors: Andrew M. Hall, Omar M. Zamzami, Natasha Whibley, Daniel P. Hampsey, Anne M. Haggart, Mark A. Vickers and Robert N. Barker**

**Information about the contributions of each person named as having participated in the study**

- 1) Guarantor(s), i.e., person(s) who is (are) responsible for the integrity of the work as a whole:
- Robert N. Barker, Division of Applied Medicine, University of Aberdeen, UK. E-mail: r.n.barker@abdn.ac.uk
  - Mark A. Vickers, Division of Applied Medicine, University of Aberdeen, UK. E-mail: m.a.vickers@abdn.ac.uk
  - Andrew M. Hall, Division of Applied Medicine, University of Aberdeen, UK. E-mail: a.m.hall@abdn.ac.uk

According to the International Committee of Medical Journal Editors (ICMJE) ([http://www.icmje.org/ethical\\_1author.html](http://www.icmje.org/ethical_1author.html)): “Authorship credit should be based on: 1) substantial contributions to conception and design, acquisition of data, or analysis and interpretation of data; 2) drafting the article or revising it critically for important intellectual content; and 3) final approval of the version to be published. Authors should meet conditions 1, 2, and 3 ..... Acquisition of funding, collection of data, or general supervision of the research group alone does not constitute authorship”.

The guarantors of this manuscript confirm that all persons designated as authors qualify for authorship, and that each author has participated sufficiently in the work to take public responsibility for appropriate portions of the content.

2) Authors who participated in the conception of the study: Robert Barke, Mark Vickers

3) **Design & Methods.** The following authors were responsible for specific investigations (please detail):

- Andrew M. Hall wrote the manuscript, designed and performed experiments and analysed data.
- Omar Zamazami performed experiments and analysed data
- Natasha Whibley performed experiments and analysed data
- Daniel Hamspey performed experiments and analysed data
- Anne Haggart performed experiments and analysed data
- Mark Vickers supervised the project, analysed data, wrote the manuscript and is responsible for the original concept
- Robert Barker supervised the project, analysed data, wrote the manuscript and is responsible for the original concept

4) **Results.** The following authors were responsible for specific portions of the results, including figures and tables (please indicate the person responsible for each figure and each table):

- Figure 1: Andrew Hall, Anne Haggart, Omar Zamazami
- Figure 2: Andrew Hall, Anne Haggart, Omar Zamazami, Mark Vickers
- Figure 3: Andrew Hall, Omar Zamazami, Natasha Whibley, Daniel Hampsey
- Figure 4: Andrew Hall, Omar Zamzami, Natasha Whibley, Daniel Hampsey

5) **Writing the manuscript.** The following authors were responsible for writing the manuscript:

- Andrew Hall, Mark Vickers, Robert Barker

**6) Contributors Listed in Acknowledgments:**

This work was supported by grants from the Scottish National Blood Transfusion Service, NHS Grampian, the Government of Saudi Arabia and the Wellcome Trust (UK). The authors would like to thank the patients and staff at the Haematology Department, Aberdeen Royal Infirmary, without whom this work could not have been completed
